# Supplementary material for: Lumbar Roll Usage While Sitting Reduces the Forward Head Posture in Healthy Individuals: A Systematic Review with Meta-Analysis
Source: MDPI journal article supplement (doi:10.3390/ijerph18105171), 2021-05-13
Supplement: s1 [file s1]

**Table S1.** Search terms for EMBASE, MEDLINE, and the Cochrane Library.

---

#1 back: ta OR back: ab  
#2 lumbar: ta OR lumbar: ab  
#3 pelvic: ta OR pelvic: ab  
#4 sacral: ta OR sacral: ab  
#5 #1 OR #2 OR #3 OR #4  
#6 pillow: ta OR pillow: ab  
#7 support: ta OR support: ab  
#8 roll: ta OR roll: ab  
#9 #6 OR #7 OR #8  
#10 neck: ta OR neck: ab  
#11 cervical: ta OR cervical: ab  
#12 head: ta OR head: ab  
#13 #10 OR #11 OR #12  
#14 #5 AND #9 AND #13

---
